# Supplementary material for: First-principles determination of the crystallography of the low-temperature phase for NbRu and TaRu shape memory alloys
Source: Royal Society of Chemistry journal article supplement (doi:10.1039/d2cp02158g), 2022-01-01
Supplement: d2cp02158g1.pdf [file d2cp02158g1.pdf]

## Supporting information

First-principles determination of the crystallography of the low-temperature phase for

NbRu and TaRu shape memory alloys

Wenzhou Chen\*, Ronghua Yuan, Furui Tan, and Weina Xu

School of Materials Science and Engineering, Dongguan University of Technology, Guangdong

523808, China.

\* Corresponding Authors: [chenwz@dgut.edu.cn](mailto:chenwz@dgut.edu.cn) (W. C.)

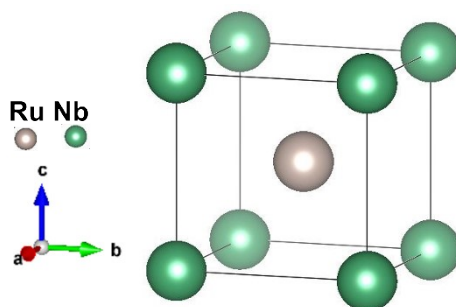

Figure S1. The crystallographic of the cubic phase (Pm-3m) for NbRu alloy. The structural parameters  $a = b = c = 3.180 \text{ \AA}$ , and  $\alpha = \beta = \gamma = 90^\circ$ . Nb atom locate at Wyckoff position (1a): (0.0, 0.0, 0.0), whereas Ru atom locate at Wyckoff position (1b): (0.5, 0.5, 0.5).

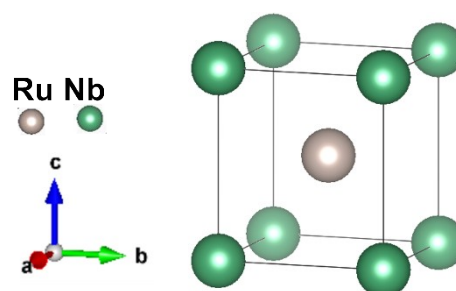

Figure S2. The crystallographic of the tetragonal phase (P4/mmm) for NbRu alloy. The structural parameters  $a = b = 3.062 \text{ \AA}$ ,  $c = 3.431 \text{ \AA}$ , and  $\alpha = \beta = \gamma = 90^\circ$ . Nb atom locate at Wyckoff position (1a): (0.0, 0.0, 0.0), whereas Ru atom locate at Wyckoff position (1d): (0.5, 0.5, 0.5).

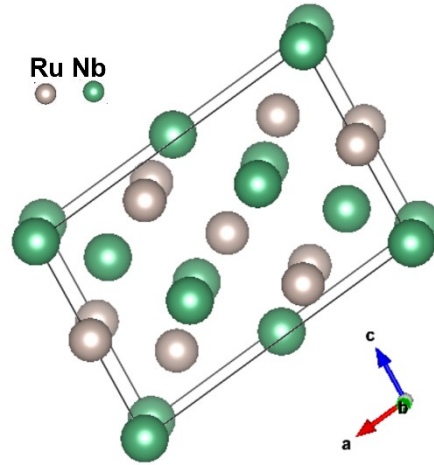

Figure S3. The crystallographic of the monoclinic phase ( $P2/m$ ) for NbRu alloy. The structural parameters are listed in table S1.

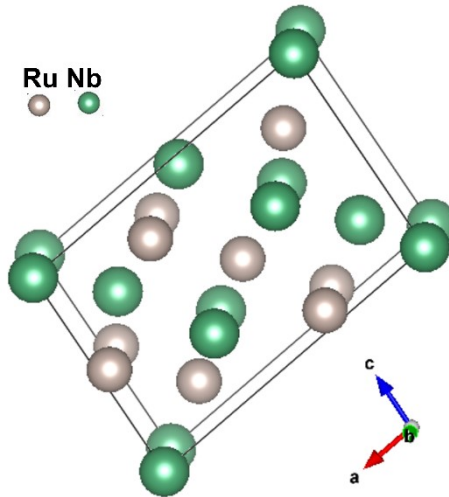

Figure S4. The crystallographic of the monoclinic phase ( $P2_1/m$ ) for NbRu alloy. The structural parameters are listed in table S1.

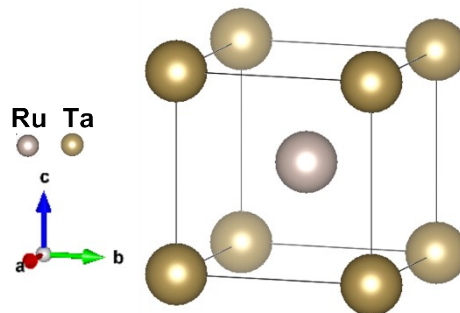

Figure S5. The crystallographic of the cubic phase ( $Pm-3m$ ) for TaRu alloy. The structural parameters  $a = b = c = 3.164 \text{ \AA}$ , and  $\alpha = \beta = \gamma = 90^\circ$ . Ta atom locate at Wyckoff position (1a):  $(0.0, 0.0, 0.0)$ , whereas Ru atom locate at Wyckoff position (1b):  $(0.5, 0.5, 0.5)$ .

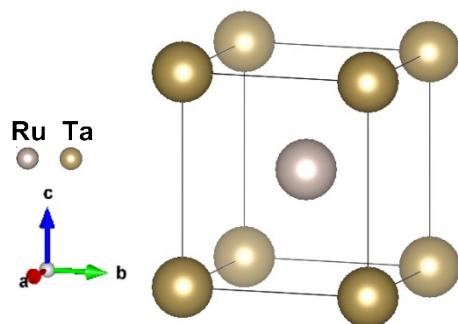

Figure S6. The crystallographic of the tetragonal phase (P4/mmm) for TaRu alloy. The structural parameters  $a = b = 3.049 \text{ \AA}$ ,  $c = 3.407 \text{ \AA}$ , and  $\alpha = \beta = \gamma = 90^\circ$ . Ta atom locate at Wyckoff position (1a): (0.0, 0.0, 0.0), whereas Ru atom locate at Wyckoff position (1d): (0.5, 0.5, 0.5).

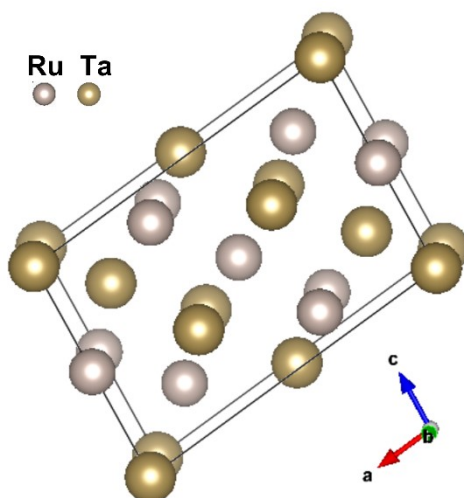

Figure S7. The crystallographic of the monoclinic phase (P2/m) for TaRu alloy. The structural parameters are listed in table S2.

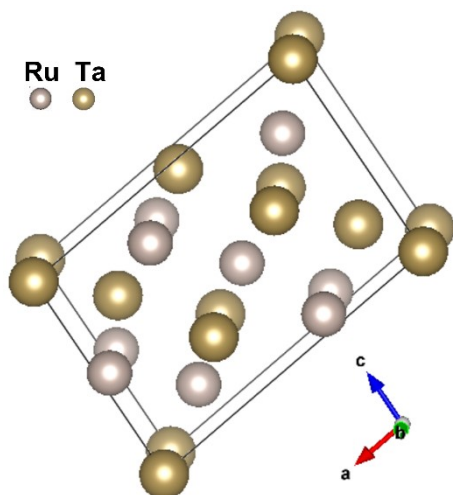

Figure S8. The crystallographic of the monoclinic phase ( $P2_1/m$ ) for TaRu alloy. The structural parameters are listed in table S2.

Table S1 The convenient set of the atomic positions of the  $P2/m$  and the  $P2_1/m$  monoclinic structures for NbRu. WP denotes the Wyckoff position. The lattice constants and angles for the  $P2/m$  monoclinic structure are  $a = 8.095 \text{ \AA}$ ,  $b = 4.382 \text{ \AA}$ ,  $c = 5.492 \text{ \AA}$ ,  $\alpha = 90^\circ$ ,  $\beta = 97.6^\circ$  and  $\gamma = 90^\circ$ . On the other hand, the lattice constants and angles for the  $P2_1/m$  monoclinic structure are  $a = 8.067 \text{ \AA}$ ,  $b = 4.406 \text{ \AA}$ ,  $c = 5.478 \text{ \AA}$ ,  $\alpha = 90^\circ$ ,  $\beta = 97.1^\circ$  and  $\gamma = 90^\circ$ .

| Atom | WP | P2/m   |        |        | WP   | P2 <sub>1</sub> /m |        |        |
|------|----|--------|--------|--------|------|--------------------|--------|--------|
|      |    | x      | y      | z      |      | x                  | y      | z      |
| Nb-1 | 1a | 0.0000 | 0.0000 | 0.0000 | 2e   | 0.0132             | 0.0000 | 0.0448 |
| Nb-2 | 1e | 0.5000 | 0.5000 | 0.0000 | 2e'  | 0.5013             | 0.5000 | 0.9786 |
| Nb-3 | 2m | 0.3233 | 0.0000 | 0.6212 | 2e'' | 0.3089             | 0.0000 | 0.5997 |
| Nb-4 |    | 0.6767 | 0.0000 | 0.3788 | 2e'  | 0.6654             | 0.0000 | 0.3547 |
| Nb-5 | 2n | 0.8541 | 0.5000 | 0.7287 | 2e'' | 0.8578             | 0.5000 | 0.7336 |
| Nb-6 |    | 0.1459 | 0.5000 | 0.2713 | 2e   | 0.1535             | 0.5000 | 0.2885 |
| Ru-1 | 1c | 0.0000 | 0.0000 | 0.5000 | 2e   | 0.9786             | 0.0000 | 0.5311 |
| Ru-2 | 1h | 0.5000 | 0.5000 | 0.5000 | 2e'  | 0.5015             | 0.5000 | 0.4899 |
| Ru-3 | 2m | 0.3503 | 0.0000 | 0.1390 | 2e'' | 0.3589             | 0.0000 | 0.1197 |
| Ru-4 |    | 0.6497 | 0.0000 | 0.8610 | 2e'  | 0.6652             | 0.0000 | 0.8434 |
| Ru-5 | 2n | 0.8083 | 0.5000 | 0.2086 | 2e'' | 0.8077             | 0.5000 | 0.2136 |
| Ru-6 |    | 0.1917 | 0.5000 | 0.7914 | 2e   | 0.1881             | 0.5000 | 0.8022 |

Table S2 The convenient set of the atomic positions of the  $P2/m$  and the  $P2_1/m$  monoclinic structures for TaRu. WP denotes the Wyckoff position. The lattice constants and angles for the  $P2/m$  monoclinic structure are  $a = 8.048 \text{ \AA}$ ,  $b = 4.369 \text{ \AA}$ ,  $c = 5.452 \text{ \AA}$ ,  $\alpha = 90^\circ$ ,  $\beta = 97.4^\circ$  and  $\gamma = 90^\circ$ . On the other hand, the lattice constants and angles for the  $P2_1/m$  monoclinic structure are  $a = 8.029 \text{ \AA}$ ,  $b = 4.391 \text{ \AA}$ ,  $c = 5.436 \text{ \AA}$ ,  $\alpha = 90^\circ$ ,  $\beta = 97.0^\circ$  and  $\gamma = 90^\circ$ .

| Atom | WP | P2/m | WP | P2 <sub>1</sub> /m |
|------|----|------|----|--------------------|
|      |    |      |    |                    |

|      |    | x      | y      | z      |     | x      | y      | z      |
|------|----|--------|--------|--------|-----|--------|--------|--------|
| Ta-1 | 1a | 0.0000 | 0.0000 | 0.0000 | 2e  | 0.0118 | 0.0000 | 0.0433 |
| Ta-2 | 1e | 0.5000 | 0.5000 | 0.0000 | 2e' | 0.5012 | 0.5000 | 0.9806 |
| Ta-3 | 2m | 0.3242 | 0.0000 | 0.6255 | 2e' | 0.3108 | 0.0000 | 0.6035 |
| Ta-4 |    | 0.6758 | 0.0000 | 0.3745 | 2e' | 0.6655 | 0.0000 | 0.3527 |
| Ta-5 | 2n | 0.8519 | 0.5000 | 0.7250 | 2e' | 0.8559 | 0.5000 | 0.7298 |
| Ta-6 |    | 0.1481 | 0.5000 | 0.2750 | 2e  | 0.1549 | 0.5000 | 0.2900 |
| Ru-1 | 1c | 0.0000 | 0.0000 | 0.5000 | 2e  | 0.9786 | 0.0000 | 0.5312 |
| Ru-2 | 1h | 0.5000 | 0.5000 | 0.5000 | 2e' | 0.5017 | 0.5000 | 0.4908 |
| Ru-3 | 2m | 0.3489 | 0.0000 | 0.1408 | 2e' | 0.3578 | 0.0000 | 0.1222 |
| Ru-4 |    | 0.6511 | 0.0000 | 0.8592 | 2e' | 0.6650 | 0.0000 | 0.8425 |
| Ru-5 | 2n | 0.8088 | 0.5000 | 0.2069 | 2e' | 0.8089 | 0.5000 | 0.2111 |
| Ru-6 |    | 0.1912 | 0.5000 | 0.7931 | 2e  | 0.1881 | 0.5000 | 0.8021 |

Table S3 The standard set of the atomic positions of the  $P2_1/m$  monoclinic structure for NbRu. WP denotes the Wyckoff position. The corresponding structural parameters are  $a = 8.067 \text{ \AA}$ ,  $b = 4.406 \text{ \AA}$ ,  $c = 5.478 \text{ \AA}$ ,  $\alpha = 90^\circ$ ,  $\beta = 97.1^\circ$  and  $\gamma = 90^\circ$ .

| Atom          | WP   | $P2_1/m$ |        |        |
|---------------|------|----------|--------|--------|
|               |      | x        | y      | z      |
| Nb-1 and Nb-6 | 2e   | 0.9299   | 0.7500 | 0.8782 |
| Nb-2 and Nb-4 | 2e'  | 0.4180   | 0.2500 | 0.8120 |
| Nb-3 and Nb-5 | 2e'' | 0.2256   | 0.7500 | 0.4331 |
| Ru-1 and Ru-6 | 2e   | 0.8953   | 0.7500 | 0.3645 |
| Ru-2 and Ru-4 | 2e'  | 0.4182   | 0.2500 | 0.3233 |
| Ru-3 and Ru-5 | 2e'' | 0.2756   | 0.7500 | 0.9531 |

Table S4 The standard set of the atomic positions of the  $P2_1/m$  monoclinic structure for TaRu.

WP denotes the Wyckoff position. The corresponding structural parameters are  $a = 8.029 \text{ \AA}$ ,  $b = 4.391 \text{ \AA}$ ,  $c = 5.436 \text{ \AA}$ ,  $\alpha = 90^\circ$ ,  $\beta = 97.0^\circ$  and  $\gamma = 90^\circ$ .

| Atom          | WP   | $P2_1/m$ |        |        |
|---------------|------|----------|--------|--------|
|               |      | x        | y      | z      |
| Ta-1 and Ta-6 | 2e   | 0.9285   | 0.7500 | 0.8767 |
| Ta-2 and Ta-4 | 2e'  | 0.4179   | 0.2500 | 0.8140 |
| Ta-3 and Ta-5 | 2e'' | 0.2275   | 0.7500 | 0.4369 |
| Ru-1 and Ru-6 | 2e   | 0.8953   | 0.7500 | 0.3646 |
| Ru-2 and Ru-4 | 2e'  | 0.4184   | 0.2500 | 0.3242 |
| Ru-3 and Ru-5 | 2e'' | 0.2745   | 0.7500 | 0.9556 |
